# Supplementary material for: Parent-Child Affect, Communication, and Engagement during Everyday Conflict Resolution Interactions
Source: Research Square preprint supplement (doi:10.21203/rs.3.rs-7490756/v1), 2025-11-17
Supplement: Supplementary file 1 [file a0de58a3610c77f3579a1d98.docx]

**Parent-Child Affect, Communication, and Engagement during Everyday Conflict Resolution Interactions**

**Online Supplemental Materials**

**Supplement A**

**Topics List for Parent-Child Conflict Resolution Discussions**

| Second Grade – Parent-Initiated Conversation | |
| --- | --- |
| The child is... | Being a picky eater and not eating what is served at mealtime. |
|  | Lying to avoid consequences for their actions. |
|  | Complaining about doing chores. |
|  | Frustrated with homework. |
|  | Fighting with a sibling. |
|  | Not wanting to turn off electronics (iPad, TV, computer, etc.). |
|  | Having trouble getting out of bed or getting ready in the morning. |
|  | Teasing peers or siblings. |
|  | Using foul language. |
|  | Pushing, shoving, or hitting others. |
| The child is not... | Listening to directions. |
|  | Cleaning up after themselves (i.e., cleaning their room, putting away toys). |
|  | Sharing toys with siblings/others. |
|  | Listening to their agreed upon bedtime. |
|  | Listening to parent on what to wear (i.e., not wearing a coat when it’s cold outside). |
|  | Wanting to go to school or do their homework. |
|  | Being patient with parent or others. |
|  | Wanting to attend certain events (i.e., family gatherings, church). |
|  | Wanting to practice an instrument (i.e., piano) or sport (i.e., soccer). |
|  | Wanting to brush their teeth before bed or in the morning. |
| Third Grade – Child-Initiated Conversation | |
| Eating food you don’t like | |
| Completing chores that you don’t like | |
| Stopping and interrupting play time to complete chores | |
| Receiving help on your homework when you don’t want help | |
| Doing homework when you don’t want to/not ready | |
| Being blamed for fights with siblings | |
| Parent(s) don’t step in when sibling is being mean | |
| Being rushed by your parent | |
| Too early of bedtime | |
| Practicing instruments | |
| Playing a sport that you don’t like | |
| Wearing clothes that you don’t want to wear (i.e., uncomfortable) | |
| Not wanting to attend certain events (i.e., family gatherings, church) | |

**Supplement B**

**Parent-child Affect, Communication, and Engagement (PACE) Coding Scheme**

## **Parent Codes**

Parent shows *intense* positive emotions or behaviors.

1 = The parent does not show any intense positive emotions or behavior.

2 = The parent encourages or affirms the child, but the parent is not enthusiastic or speaks with a flat tone.

3 = The parent encourages or affirms the child. The parent speaks with a warm tone but is not overly enthusiastic.

4 = The parent’s intensity of positive emotions or behaviors is high. The parent enthusiastically encourages or affirms the child.

Parent shows *frequent* positive emotions and behaviors throughout the task.

1 = The parent does not show any positive emotions or behaviors.

2 = The parent shows a positive emotion or behavior once during the task.

3 = The parent shows positive emotions and/or behaviors occasionally during the task, but it is not consistent.

4 = The parent shows positive emotions and/or behaviors consistently throughout the task.

Parent shows *intense* anger, impatience, or frustration.

1 = The parent shows no anger, impatience, or frustration.

2 = The parent shows slight anger, impatience, or frustration such as sighing, shaking their head, or a negative facial expression or tone of voice.

3 = The parent shows clear signs of anger, impatience, or frustration. The parent speaks to the child with a critical, impatient, or frustrated tone and may also use negative body language or facial expressions.

4 = The parent’s intensity of anger is high, and their expression of anger, impatience, or frustration is not controlled. They may yell at the child or refuse to engage further with the child and the incident could be described as an “explosion” or the parent “lashing out.”

Parent shows *frequent* anger, impatience, or frustration throughout the task.

1 = The parent does not show any anger, impatience, or frustration.

2 = The parent expresses a negative emotion once during the task.

3 = The parent expresses anger, impatience, or frustration occasionally during the task, but it is not consistent.

4 = The parent expresses anger, impatience, or frustration consistently throughout the task.

Parent is responsive to the child’s suggestions.

*Note, that this includes suggestions that are both helpful and not helpful to completing the task.*

1 = The parent is generally not responsive to the child’s suggestions. The parent does not acknowledge the child’s suggestions and may continue to complete the task without implementing the child’s suggestion or is uninvolved.

2 = The parent generally provides short verbal or physical acknowledgement of the child’s suggestions (e.g., “sure,” “okay,” nodding), but does not change their behavior. The parent may continue to complete the task without implementing the child’s suggestions or may continue to be uninvolved.

3 = The parent generally acknowledges the child’s suggestions and may adjust their behavior if the child’s suggestions aid in completing the task. The parent does not engage in conversations with the child regarding their suggestions.

4 = The parent engages in conversations with the child regarding the child’s suggestions. If necessary, the parent adjusts their behavior according to the child’s suggestions if they aid in completing the task.

Parent is attentive and cognitively engaged with the child.

*Note, this refers to parent’s cognitive engagement with their child (i.e., listening to child, paying attention to child).*

1 = The parent does not attend to the child during the task. The parent is disengaged/uninvolved and is silent or discuss irrelevant information to completing the task (e.g., what is for dinner).

2 = The parent is occasionally attentive and engaged with the child but spends most of the time disengaged/uninvolved.

3 = The parent is generally attentive and engaged with the child but may become disengaged for moments at a time (e.g., briefly checks their phone or watch, gets up from the task to stretch).

4 = The parent is attentive and engaged with the child throughout the entire task.

Parent verbally brings up or engages with non-task-related topics.

*Note, this refers to parent’s verbal engagement with their child and not their attentiveness. It does not count if the parent just acknowledges an off-task topic and immediately brings the conversation back to the topic.*

1 = The parent never verbally brings up or engages with non-task-related topics.

2 = The parent brings up or engages with one non-task-related topic briefly during the task (e.g., what time it is, what is for dinner).

3 = The parent occasionally brings up or engages with non-task-related topics throughout the session.

4 = The parent consistently brings up or engages with non-task-related topics throughout the session.

Parent interrupts the child.

1 = The parent never interrupts the child during the task. Or, the parent begins to interrupt the child but always lets the child proceed with their action or thought.

2 = The parent interrupts the child once.

3 = The parent occasionally interrupts the child, but it does not happen frequently.

4 = The parent constantly interrupts the child during the task.

Parent explains how and why things are done at a level that the child understands.

1 = The parent does not explain to the child how and why things are done.

2 = The parent occasionally explains how and why things are done, but the child does not seem to benefit from these explanations. The parent’s explanations are very short or vague.

3 = The parent explains how and why things are done, but the child needs further clarification or help following the original explanation.

4 = The parent explains to the child why and how things are done, and the child seems to understand explanations by changing task strategy or expressing comprehension. The parent and child’s communication are in sync.

The parent provides frequent explanations and guidance to the child throughout the task.

1 = The parent never provides explanations and/or guidance to the child.

2 = The parent provides explanations and/or guidance to the child once during the task in the form of a hint, tip, or suggestion.

3 = The parent occasionally provides explanations and/or guidance to the child during the task, but does not provide hints, tips, or suggestions consistently.

4 = The parent consistently provides explanations and/or guidance to the child during the task in the form of hints, tips, or suggestions.

The parent provides explanations and guidance to the child that aid in solving to the problem.

0 = Not applicable. The parent provided no explanations or guidance.

1 = The parent provides explanations and guidance to the child that seem unhelpful. The child does not seem to understand the parent’s suggestions or explanations.

2 = The child sometimes understands the parent’s explanations and/or guidance but expresses frequent confusion. The parent does not adjust their explanation or guidance, and so the child has trouble implementing the suggestion.

3 = The child usually understands the parent’s explanations and/or guidance, but occasionally expresses confusion or needs further clarification. The parent is generally able to help clarify their suggestions if the child is confused.

4 = The child understands the parent’s guidance and/or explanations and can implement them while completing the task. If the child expresses confusion, the parent can clarify their suggestions.

Parent displays active listening towards child (by showing interest by looking at the child or nodding when the child was speaking, asking questions to better understand what the child has said, restating what the child says, and/or encouraging the child to talk).

*It does not count as active listening if the parent asks questions to change the topic of the conversation or asks a reality testing question. The question needs to be about understanding what the child has said.*

1 = The parent does not display active listening towards child.

2 = The parent engages in active listening once by showing slight interest in the child continuing to talk or asking a question or restating what the child has said.

3 = The parent occasionally engages in active listening by showing interest in the child continuing to talk, asking the child questions, and/or restating what the child has said.

4 = The parent consistently engages in active listening by showing interest in the child continuing to talk, asking the child questions, and/or restating what the child has said.

## **Child Codes**

Child shows *intense* positive emotions or behaviors.

1 = The child does not show any intense positive emotions or behavior.

2 = The child uses positive language (e.g., “that’s a good idea”), but the child is not enthusiastic or speaks with a flat tone.

3 = The child uses positive language and speaks with a warm tone but is not overly enthusiastic.

4 = The child’s intensity of positive emotions or behaviors is high. The child enthusiastically uses positive language during the task.

Child shows *frequent* positive emotions and behaviors throughout the task.

1 = The child does not show any positive emotions or behaviors.

2 = The child shows a positive emotion or behavior once during the task.

3 = The child shows positive emotions and/or behaviors occasionally during the task, but it is not consistent.

4 = The child shows positive emotions and/or behaviors consistently throughout the task.

Child shows *intense* anger, impatience, or frustration.

1 = The child shows no anger, impatience, or frustration.

2 = The child shows slight anger, impatience, or frustration such as sighing, shaking their head, or a negative facial expression or tone of voice.

3 = The child shows clear signs of anger, impatience, or frustration. The child speaks to the parent with a critical, impatient, or frustrated tone and may also use negative body language or facial expressions.

4 = The child’s intensity of anger is high, and their expression of anger, impatience, or frustration is not controlled. They may yell at the parent or refuse to engage further with the parent and the incident could be described as an “explosion” or the child “lashing out.”

Child shows *frequent* anger, impatience, or frustration throughout the task.

1 = The child does not show any anger, impatience, or frustration.

2 = The child expresses a negative emotion once during the task.

3 = The child expresses anger, impatience, or frustration occasionally during the task, but it is not consistent.

4 = The child expresses anger, impatience, or frustration consistently throughout the task.

Child is attentive and cognitively engaged with the parent.

*Note, this refers to child’s cognitive engagement with their parent (i.e., listening to child, paying attention to child).*

1 = The child does not attend to the parent during the task. The child is disengaged/uninvolved and is silent or discuss irrelevant information to completing the task (e.g., what is for dinner).

2 = The child is occasionally attentive and engaged with the parent but spends most of the time disengaged/uninvolved.

3 = The child is generally attentive and engaged with the parent but may become disengaged for moments at a time (e.g., briefly checks their phone or watch, gets up from the task to stretch).

4 = The child is attentive and engaged with the parent throughout the entire task.

Child verbally brings up or engages with non-task-related topics.

*Note, this refers to child’s verbal engagement with their parent and not their attentiveness.*

1 = The child never verbally brings up non-task-related topics. They do not need to be attentive or engaged with the parent.

2 = The child brings up or engages with one non-task-related topic briefly during the task (e.g., what time it is, what is for dinner).

3 = The child occasionally brings up or engages with non-task-related topics throughout the session.

4 = The child consistently brings up or engages with non-task-related topics throughout the session.

## **Team Codes**

Parent leads completion of the task.

1 = The child decides how to complete the task, and the parent follows the child’s suggestions or is uninvolved.

2 = The child generally leads completion of the task, but the parent steps in at times and takes over.

3 = The parent generally leads completion of the task, but the child steps in at times and takes over.

4 = The parent decides how to complete the task, and the child follows the parent’s suggestions or is uninvolved.

The parent and child work well together as a team.

1 = The parent and child seem to be at odds with each other. Alternatively, one member of the team may be responsible for the completion of the task, and the other may be uninvolved.

2 = The parent and child attempt to collaborate on the task, but they cannot compromise on a strategy or solution to complete the task. Overall, there is a general feeling of frustration or disagreement between the parent and child.

3 = The parent and child collaborate on the task, but occasionally, they disagree a strategy or a solution. However, disagreement does not inhibit their ability to make progress on the task. Overall, there is positive engagement from the parent and child.

4 = The actions of the parent and child are complementary to each other. Both the parent and child are positively engaged with the task and with each other, though they both do not need to be physically involved in the task.

**Appendix C**

**Suggestions for Applications of the PACE Coding Scheme**

To apply the PACE coding scheme effectively, coders typically begin by independently watching the task video multiple times. During the first viewing, coders suggest identifying the start and end points of the conflict resolution interaction. The start time is marked when the assessor finishes giving instructions and exits the room, while the end time is determined by one of the following: the dyad reaching a resolution, the assessor returning, or the last relevant on-topic statement if the conversation drifts off-topic until the assessor’s return. During this initial viewing, coders also take general notes on the tone, flow, and emotional quality of the interaction. If any behaviors are immediately clear, such as emotional expressions, parent explanations, or the outcome of the task, coders may begin preliminary coding at this stage.

The second viewing is typically more focused and detail-oriented. Coders concentrate on specific behaviors outlined in the coding scheme, recording time stamps for notable moments and tallying instances such as the parent interrupting the child or either participant becoming disengaged or going off-topic. This phase may require multiple viewings to ensure accuracy and completeness. Coders are encouraged to re-watch the video as many times as necessary to finalize their codes and notes.

Finally, coders should meet with their coding partner to discuss any uncertainties. Watching the interaction together can help resolve discrepancies and ensure consistency in how the coding scheme is applied.
